## **Deep phylogenetic analysis of *Orthocoronavirinae* genomes traces the origin, evolution and transmission route of 2019 novel coronavirus**

Amresh Kumar Sharma and Anup Som\*

Centre of Bioinformatics  
Institute of Interdisciplinary Studies  
University of Allahabad  
Prayagraj – 211002, India

\*Corresponding Author:  
Email: [som.anup@gmail.com](mailto:som.anup@gmail.com)  
Website: [www.somlab.in](http://www.somlab.in)

## Abstract

The outbreak of severe acute respiratory syndrome coronavirus 2 (SARS-CoV-2) in Wuhan city, China in December 2019 and thereafter its spillover across the world has created a global pandemic and public health crisis. Today, it appears as a threat to human civilization. Scientists and medical practitioners across the world are involved to trace out the origin and evolution of SARS-CoV-2 (also called 2019 novel coronavirus and referred as 2019-nCoV), its transmission route, cause of pathogenicity, and possible remedial action. In this work, we aim to find out the origin, evolutionary pattern that led to its pathogenicity and possible transmission pathway of 2019-nCoV. To achieve the aims we conducted a large-scale deep phylogenetic analysis on the 162 complete *Orthocoronavirinae* genomes consisting of four genera namely *Alphacoronavirus*, *Betacoronavirus*, *Deltacoronavirus* and *Gammacoronavirus*, their gene trees analysis and subsequently genome and gene recombination analyses. Our analyses revealed that i) bat, pangolin and anteater are the natural hosts of 2019-nCoV, ii) outbreak of 2019-nCoV took place via inter-intra species transmission mode, iii) host-specific adaptive mutation made 2019-nCoV more virulent, and iv) the presence of widespread recombination events led to the evolution of new 2019-nCoV strain and/or could be determinant of its pathogenicity.

**Keywords:** Orthocoronavirinae; 2019-nCoV; Genome/Gene phylogeny; Adaptive mutation; Recombination; Transmission pathway, COVID-19

## Highlights

- *Orthocoronavirinae* genome phylogeny revealed that bat, pangolin and anteater are natural reservoir hosts of novel coronavirus (2019-nCoV/SARS-CoV-2).
- Host-specific adaptive mutation occurred among the coronaviruses.
- Transmission of 2019-nCoV to human took place by inter-intra species mode of transmission.
- Presence of widespread recombination events led to the evolution of new 2019-nCoV strain and/or could be determinant of its pathogenicity.

## Introduction

Coronaviruses are single-stranded RNA virus of 26 to 32 kilobases (kb) nucleotide chain and consists of both structural and non-structural proteins. They have been known to cause lower and upper respiratory diseases, central nervous system infection and gastroenteritis in a number of avian and mammalian hosts, including humans (Gorbalenya et al 2020). The recent outbreak of novel coronavirus (2019-nCoV/SARS-COV-2) associated with acute respiratory disease called coronavirus disease 19 (commonly known as COVID-19) has caused a global pandemic and has spread over 212 countries (WHO, COVID-19 situation report). As of now, more than 4 million people have been infected and approximately 300 thousand people have died. Today, COVID-19 appears as a global threat to public health as well as to the human civilization (WHO, COVID-19 situation reports). As it was initially outbreak in Wuhan city, Hubei province, China in December 2019 but then rapidly spread to several European countries and subsequently almost the entire world (Wu et al., 2020; Zhu et al., 2019).

Coronaviruses are placed within the family *Coronaviridae*, which has two subfamilies namely *Orthocoronavirinae* and *Torovirinae*. *Orthocoronavirinae* has four genera: *Alphacoronavirus* (average genome size 28kb), *Betacoronavirus* (average genome size 30kb), *Gammacoronavirus* (average genome size 28kb), and *Deltacoronavirus* (average genome size 26kb) (de Groot et al. 2011). Coronaviruses are typically harbored in mammals and birds. Particularly *Alphacoronavirus* and *Betacoronavirus* infect mammals, and *Gammacoronavirus* and *Deltacoronavirus* infect avian species (Woo et al., 2009; 2010; Fan et al., 2019).

The previous important outbreaks of coronaviruses are severe acute respiratory syndrome coronavirus (SARS-CoV) outbreak in China in 2002/03, Middle East respiratory syndrome coronavirus (MERS-CoV) outbreak in 2012 that resulted severe epidemics in the respective geographical regions (Eickmann et al., 2003; Vijaykrishna et al., 2007; Zumla et al, 2015; Hayes et al., 2019). The present outbreak of 2019-nCoV is the third documented spillover of an animal coronavirus to humans in only two decades that has resulted in a major pandemic (Velavan and Meyer, 2020; Lai et al., 2020). Despite the deadly infection caused by 2019-nCoV, till are no specific vaccines or medicines for COVID-19.

Scientific communities across the world are trying to understand several fundamental and applied questions such as: What is the origin of 2019-nCoV? What are the possible transmission routes? Why 2019-nCoV is more deadly than other CoVs? What is its possible clinical diagnosis & treatment? etc. Consequently, a large number of research outcomes are being consistently published. In this paper, we aim to find out the origin and evolution of 2019-nCoV, and its possible transmission pathway through deep phylogenetic analysis.

## Materials and Methods

### Data selection

162 *Orthocoronavirinae* genomes were retrieved from NCBI (<https://www.ncbi.nlm.nih.gov/>) and Virus Pathogen Database and Analysis Resource (<https://www.viprbrc.org/>). We only considered complete genome sequences having no unidentified nucleotide characters. Our dataset included 23 *Alphacoronavirus*, 92 *Betacoronavirus*, 32 *Deltacoronavirus* and 15 *Gammacoronavirus* genomes from different subgenera, diverse host species and from wide geographical location (Cui et al., 2019). Further for rooting the tree, we used two genome sequences from *Torovirus* and two from *Bafinivirus* belonging to domestic cow and fish respectively. Three random sequences were generated by using the average genome length of the *Orthocoronavirinae* genomes and their average GC%. The random sequences were used to check the reliability of the topology. Overall, the phylogenetic analysis consists of 162 complete *Orthocoronavirinae* genomes; four outgroups sequences and three random sequences.

### Phylogenetic reconstruction

The genome sequences were aligned using the MAFFT alignment tool (Kato et al., 2002). Genome tree of the *Orthocoronavirinae* and *Betacoronavirus* were reconstructed using maximum likelihood (ML) method and GTR+G+I model of sequence evolution as revealed by the model test with 1000 bootstrap support. Trees were reconstructed using IQ-TREE software (Nguyen et al., 2015) and were visualized with iTOL software (Letunic et al., 2019). Five gene trees namely Orf1ab, Spike (S), Membrane (M), Envelope (E) and Nucleocapsid (N) were reconstructed using amino acid sequences. ML method of tree reconstruction and protein-specific amino acids

evolution model as revealed by the model test was used for gene trees reconstruction. Bootstrap test with 1000 bootstrap replicates was carried out to check the reliability of the gene trees.

### **Genome and gene recombination analysis**

Potential recombination events in the history of the *Betacoronaviruses* were assessed using the RDP5 package (Martin et al., 2015). The RDP5 analysis was conducted based on the complete genome sequence using RDP, GENECONV, BootScan, MaxChi, Chimera, SiScan, and 3Scan methods. Putative recombination events were identified with a Bonferroni corrected P-value cut-off of 0.05 supported by more than four methods.

### **Results and Discussion**

The genome phylogeny of *Orthocoronavirinae* depicts that Alpha, Beta, Delta and Gamma coronaviruses clustered according to their cladistic relations (Fig. 1). This result is consistent with the other results (Luk et al. 2019; Wu et al., 2020). Furthermore, *Gammacoronavirus* and *Deltacoronavirus* appeared in a single clade (i.e. formed a monophyletic group). Interestingly *Betacoronavirus* appeared as paraphyletic clade to the Gamma-Delta monophyletic clade. *Alphacoronavirus* emerged as a basal radiation of the *Orthocoronavirinae* phylogeny. Further, deep analysis of the genome tree revealed that the same host strains from different geographical location of *Alphacoronaviruses* are conserved (Li et al., 2020). This is probably due to the host specific adaptive mutations (Songa et al., 2005; Andersen et al., 2020). For example,



*Alphacoronavirus* strains from ferret Japan and ferret Netherland is monophyletic. Similarly cat UK is monophyletic to cat Netherland, and human China is monophyletic to human Netherland. Another interesting outcome is all *Alphacoronavirus* camel strains of Saudi Arabia appeared in a distinct sub-clade where bat Ghana appeared as outgroup which clearly indicates interspecies transmission took place from bat (Ghana) to camel followed by adaptive mutation (York, 2020; Zhou et al., 2020).

*Deltacoronavirus* and *Gammacoronavirus* clade clearly exhibits a similar evolutionary pattern. In case of *Deltacoronaviruses*, swine Vietnam and swine Hong Kong share a single common ancestor. Similarly, swine China and swine South Korea are monophyletic clade and swine Japan is monophyletic to swine South Korea. In case of *Gammacoronaviruses* (whose natural hosts are avian species), chicken Peru and chicken Uruguay shared a single common ancestor. Similarly, chicken Iraq is monophyletic to chicken Egypt strain. These results clearly confirm that coronavirus strains are present in a large number of hosts those are widespread in different geographical location.

In this work, we considered 92 complete *Betacoronavirus* genomes belonging to five subgenera namely Embecovirus, Hibecovirus, Merbecovirus, Nobecovirus and Sarbecovirus (2019-nCoV/SARS-COV-2 belongs to this group). Phylogenetic analysis of *Betacoronavirus* genomes revealed that the five subgenera clustered separately (Fig. 2). Further, the *Betacoronavirus* genome tree depicts that the host-specific strains from distance geographical locations formed monophyletic clades. For example, in Embecovirus clade, strain BJ01 P9 human China is monophyletic to the Caen1 human France strain. Similarly, Embecovirus B1 24F buffalo Bangladesh is monophyletic to BCV AKS 01 cattle China. This result infers that irrespective of the hosts' geographical location/diversity host-specific adaptive mutation occurred.

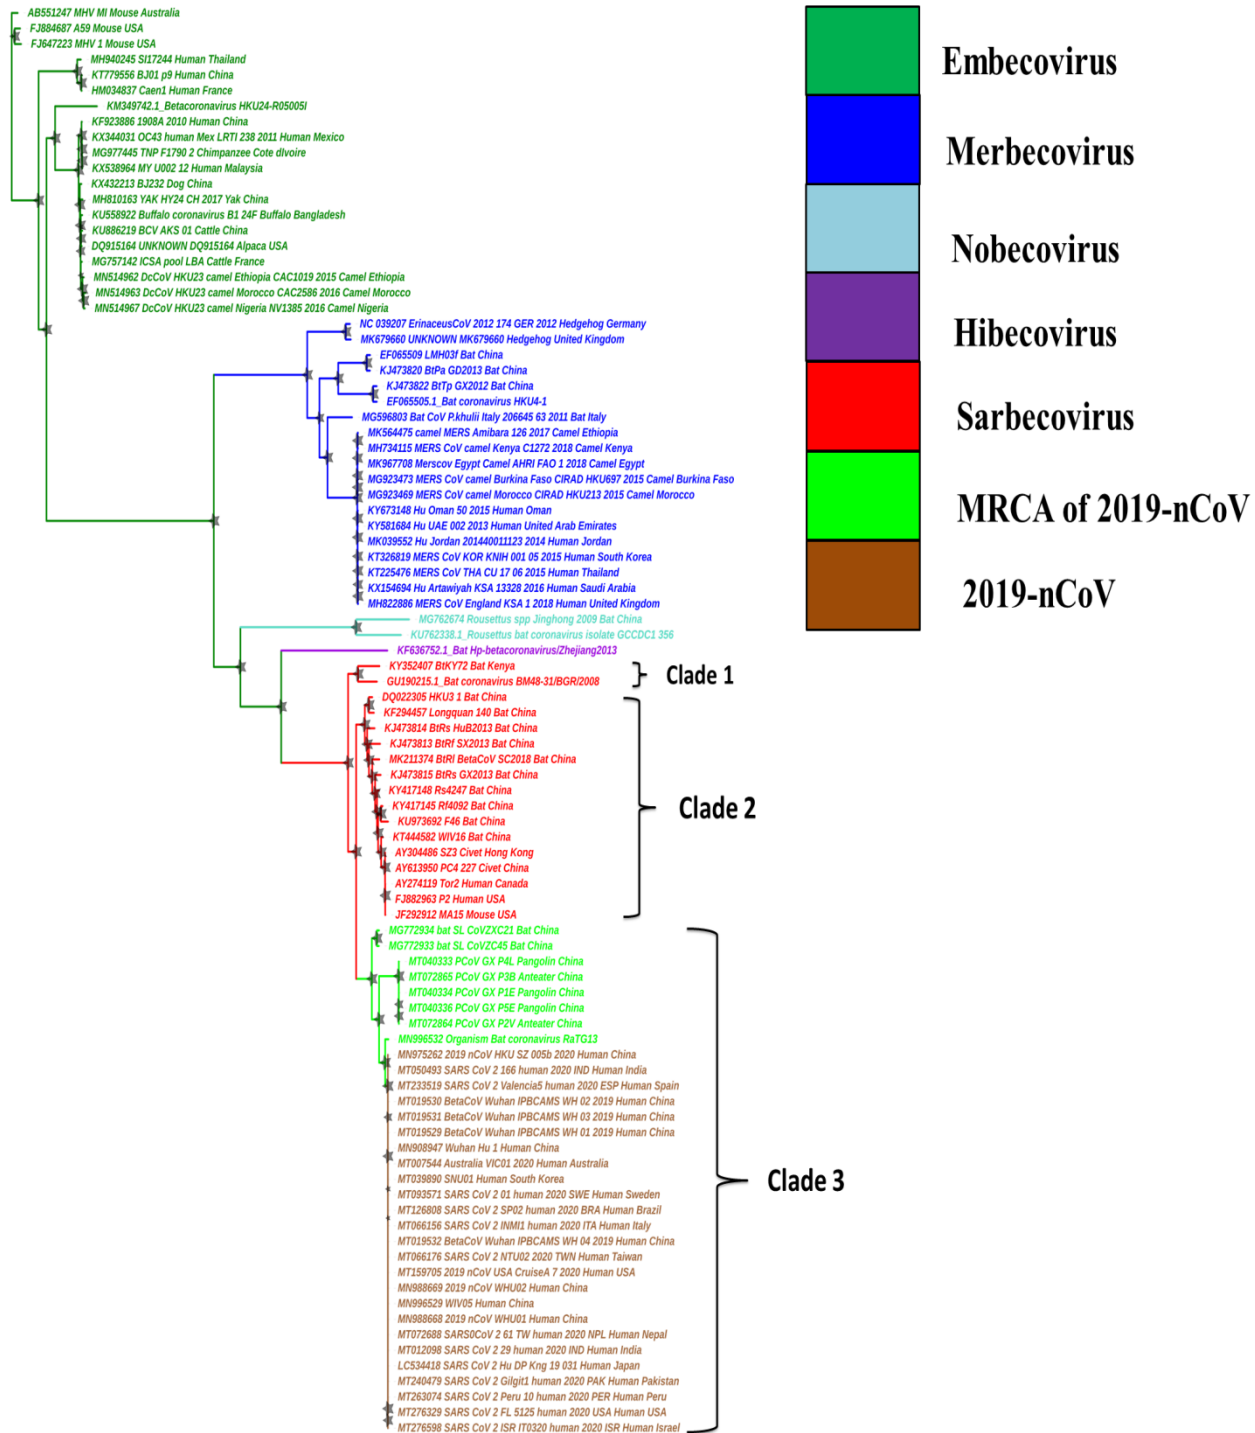

**Figure 2: *Betacoronavirus* genome phylogeny.** The genome tree consists of 92 complete *Betacoronavirus* genomes. Alignment consists of 41,054bp aligned nucleotide characters (23,064bp completely aligned characters). Tree was reconstructed using ML method with GTR (GTR+G+I) model of nucleotide evolution along with 1000 bootstrap replicates (asterisk indicates value >70%). Most recent common ancestors (MRCA) are the closely related ancestor group from 2019-nCoV.



Novel coronavirus (2019-nCoV) belongs to Sarbecovirus subgenus (Fig. 2). Sarbecoviruses formed three distinct clades, where Clade 1 consists of only bat as host species. In Clade 2, host species are bat, human and civet. Similarly, in Clade 3 the host species are bat, human, pangolin and anteater, and it depicts bat-CoV-RaTG13 (NCBI Acc no. Mn996532) is closest to CoV humans, which was evolved by the recombination of bat-SL-CoVZXC21 and bat-SL-CoVZC45 strains. The clades analysis clearly asserts bat, pangolin and anteater are the natural reservoir of 2019-nCoV, and transmission from bat /pangolin/anteater to humans took place through intermediate organisms (Cui et al., 2019; York, 2020). Furthermore, this phylogenetic tree reveals *Betacoronavirus* sequences are conserved in their respective hosts after acquiring adaptive mutation (e.g. all bat hosts clustered in Clade 2 and human hosts are in Clade 3) (Lu et al., 2020).

In addition to genome phylogeny, gene tree analysis was also conducted as it provides a more reliable basis for studying genome evolution. Five gene trees namely orf1ab, spike (S), envelope (E), Membrane (M) and Nucleocapsid (N) were used for gene tree analysis (Figs. 3-7). Except N gene tree (Fig. 6), other four gene trees have shown similar evolutionary pattern with respect to their subgenera and were in concordance with their genome tree. This observation implies that the *Betacoronavirus* genome evolution is influenced by the genes' evolution. Further deep analysis found, though subgenera-wise four gene trees are similar, but within subgenera there are widespread phylogenetic incongruences (Jeffroy et al., 2006). This result led us to hypothesize that HGTs and/or recombination had occurred among *Betacoronaviruses* in the past that are caused to evolve new strains including the emergence of pathogenic lineages. However, it was found that N gene tree has significant topological difference with other gene trees. This might be possible as gene tree differs species tree for various analytical and/or biological reasons (Degman et al., 2009; Som, 2013; 2015).

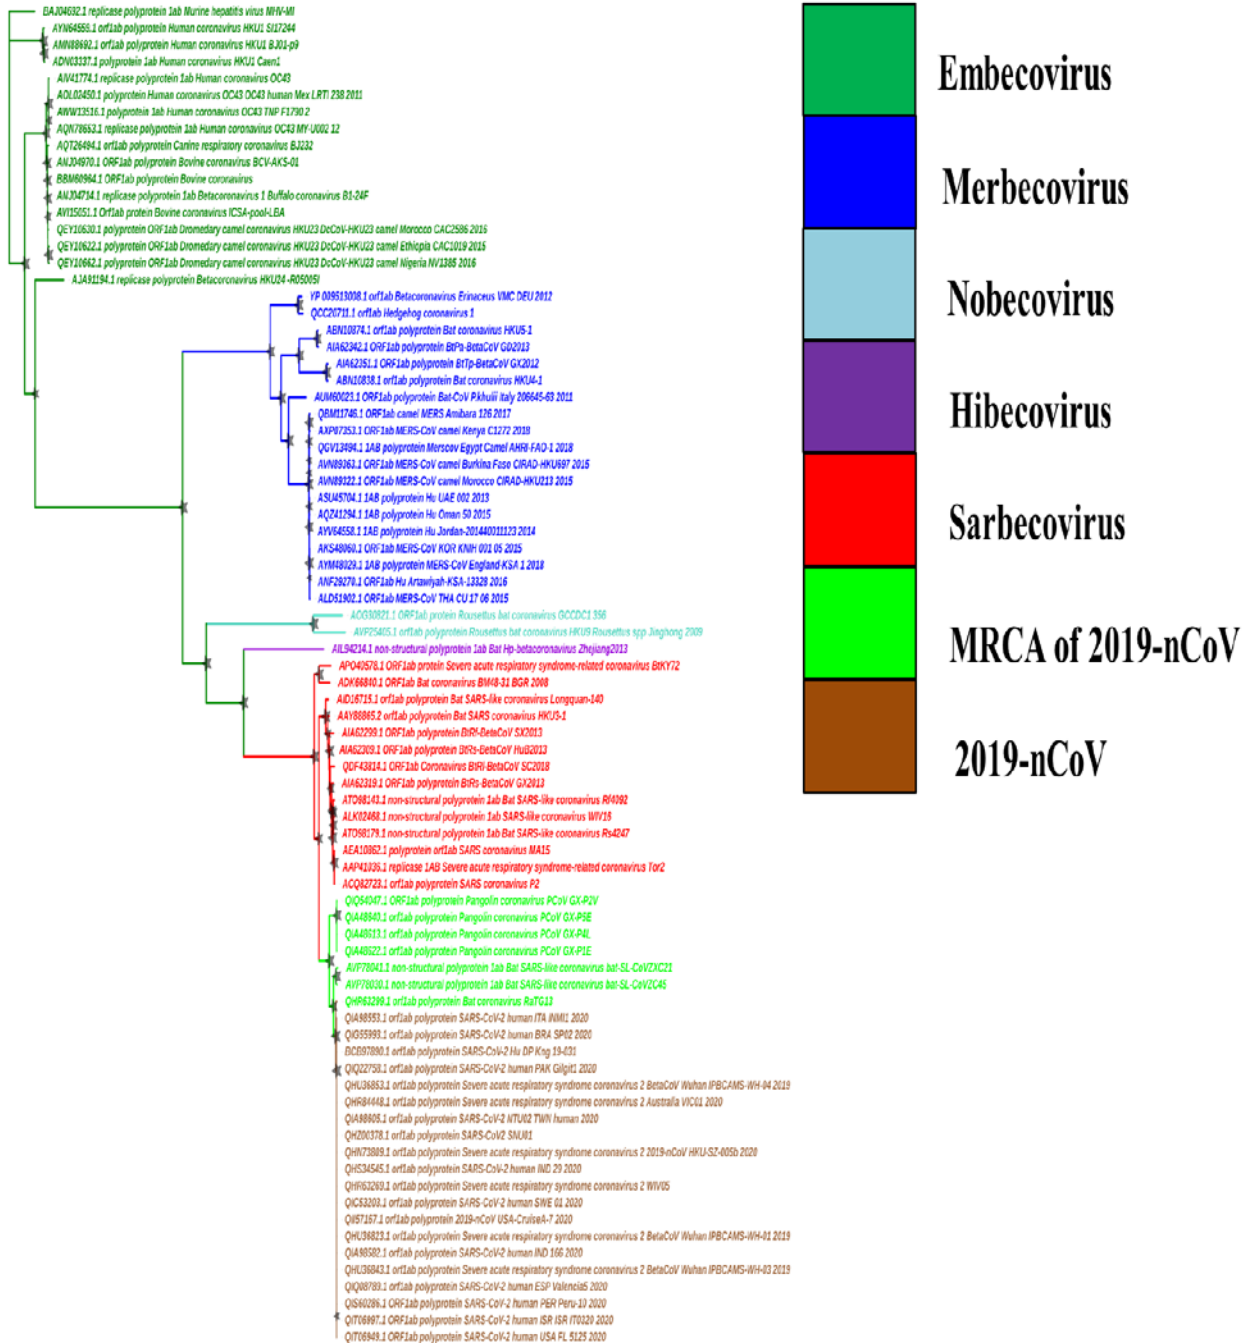

**Figure 3: Orflab gene phylogeny.** Alignment consists of 8,152bp aligned amino acid characters (6,276bp are completely aligned characters). Tree was reconstructed using ML method and LG+I+G4 model of protein evolution along with 1000 bootstrap replicates (asterisk indicates value >70%). MRCA (most recent common ancestors) are the closely related ancestor group from 2019-nCoV.

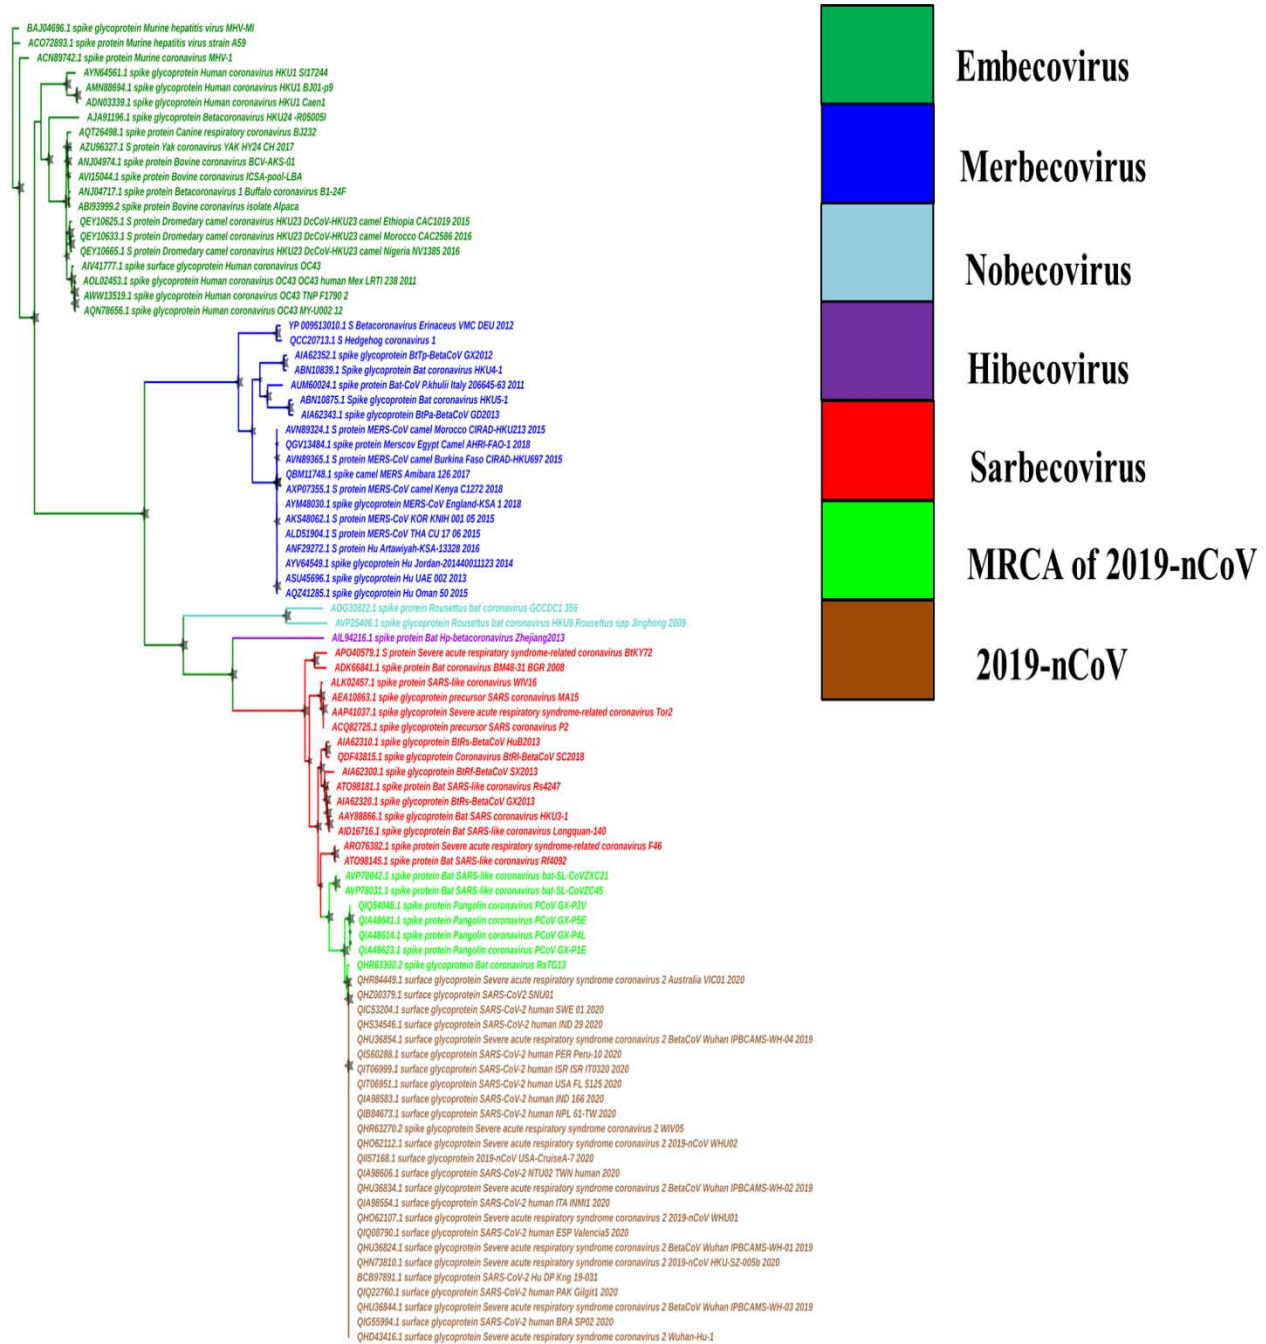

**Figure 4: Spike (S) gene phylogeny.** Alignment consists of 1,621 aligned amino acid characters (1,071bp are completely characters). Tree was reconstructed using ML method and WAG+I+G4 model of protein evolution along with 100 bootstrap replicates (asterisk indicates value >70%). MRCA (most recent common ancestors) are the closely related ancestor group from 2019-nCoV.

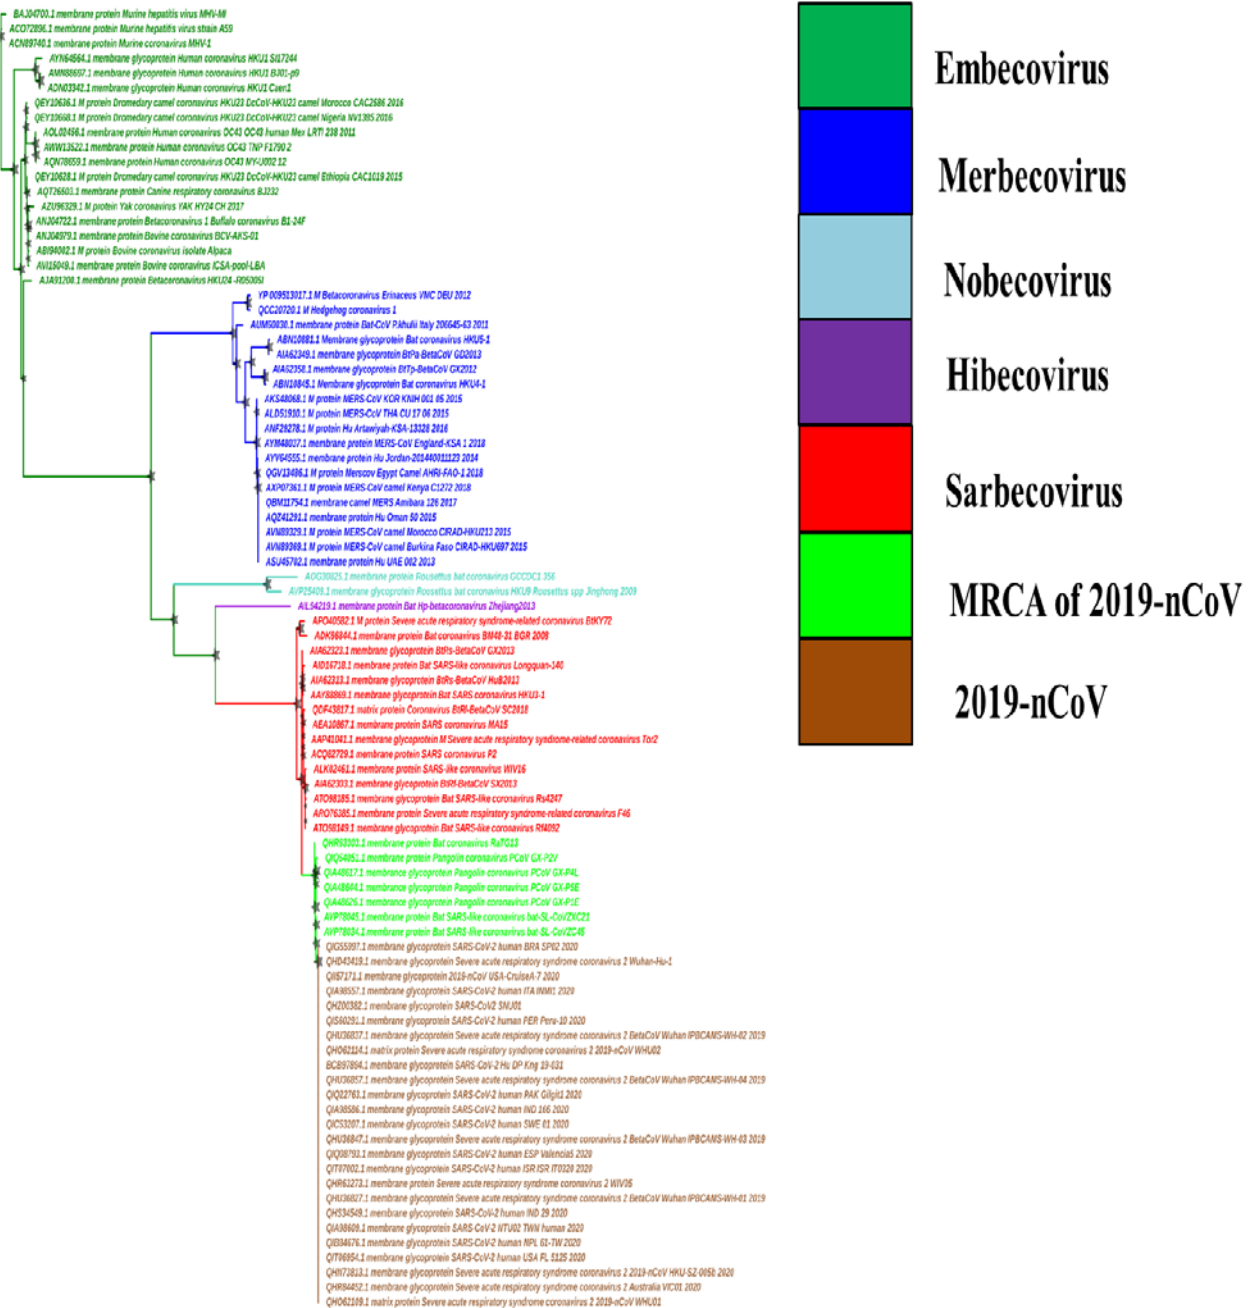

**Figure 5: Membrane (M) gene phylogeny.** Alignment consists of 233bp aligned amino acid characters (213bp are completely aligned characters). Tree was reconstructed using ML method by and LG+G4 model of protein evolution along with 1000 bootstrap replicates (asterisk indicates value >70%). MRCA (most recent common ancestors) are the closely related ancestor group from 2019-nCoV.

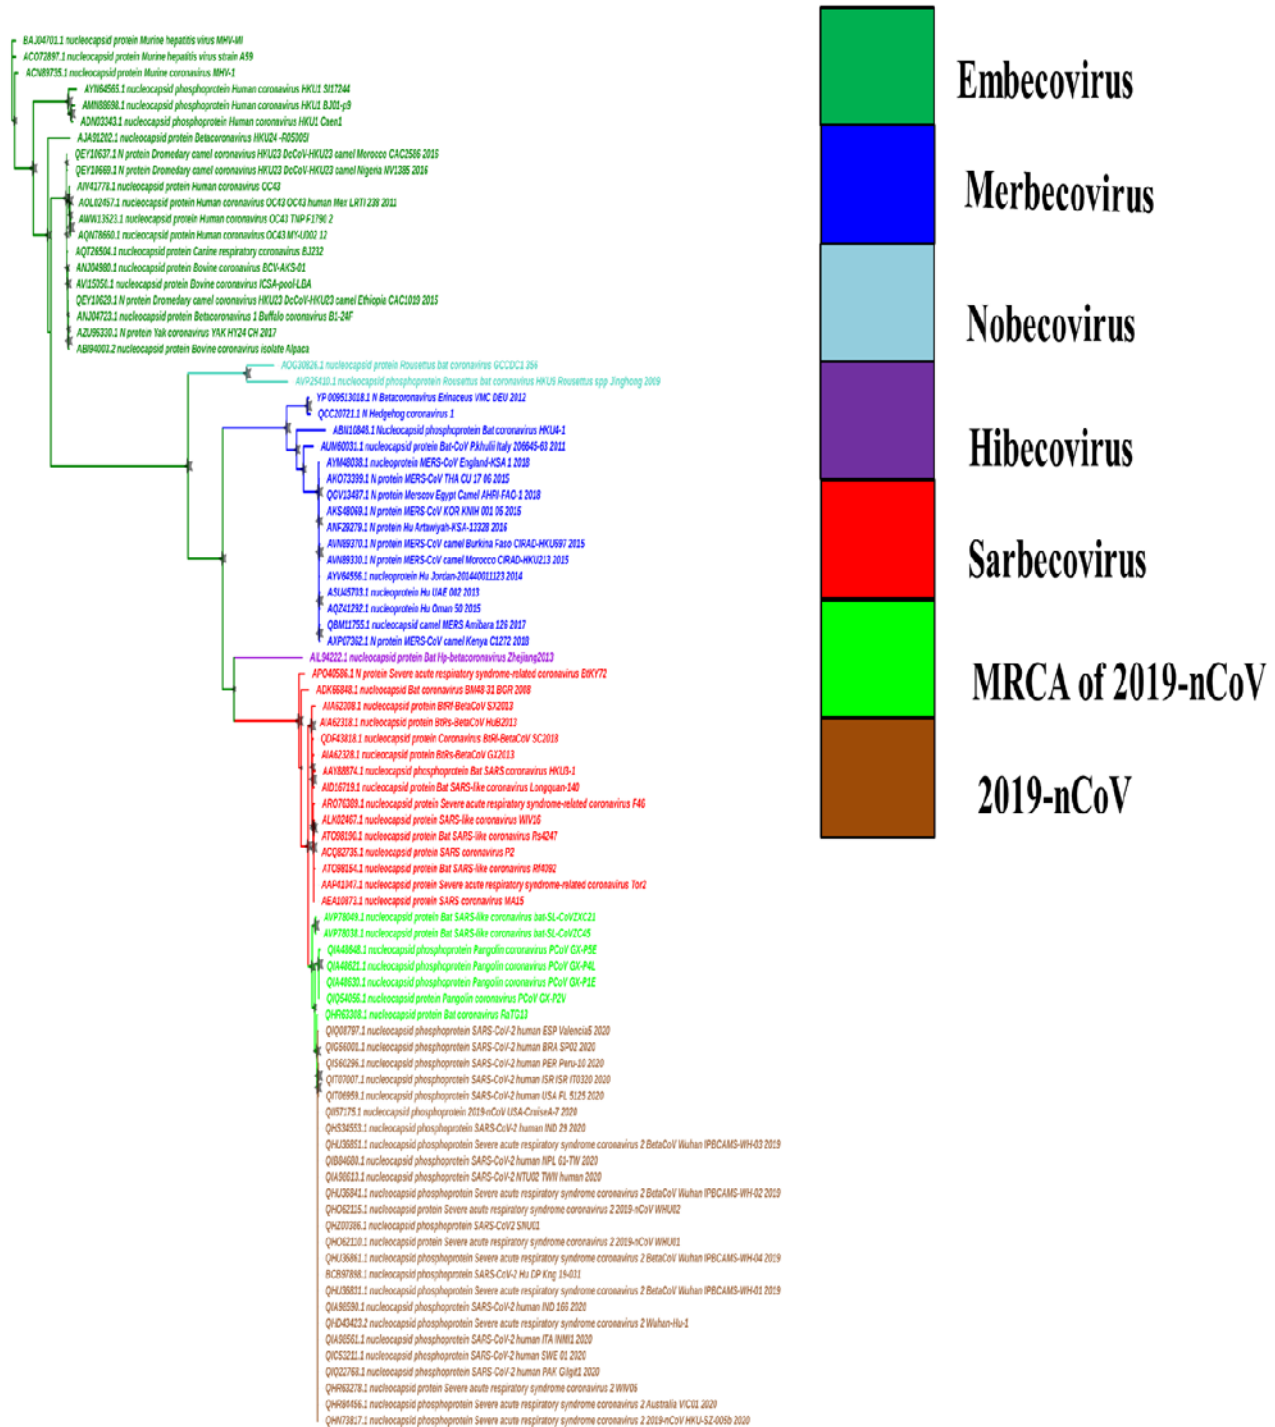

**Figure 6: Nucleocapsid (N) gene phylogeny.** Alignment consists of 547bp aligned amino acid characters (343bp are completely aligned characters). Tree was reconstructed using ML method and LG+I+G4 model of protein evolution along with 1000 bootstrap replicates (asterisk indicates value >70%). MRCA (most recent common ancestors) are the closely related ancestor group from 2019-nCoV.

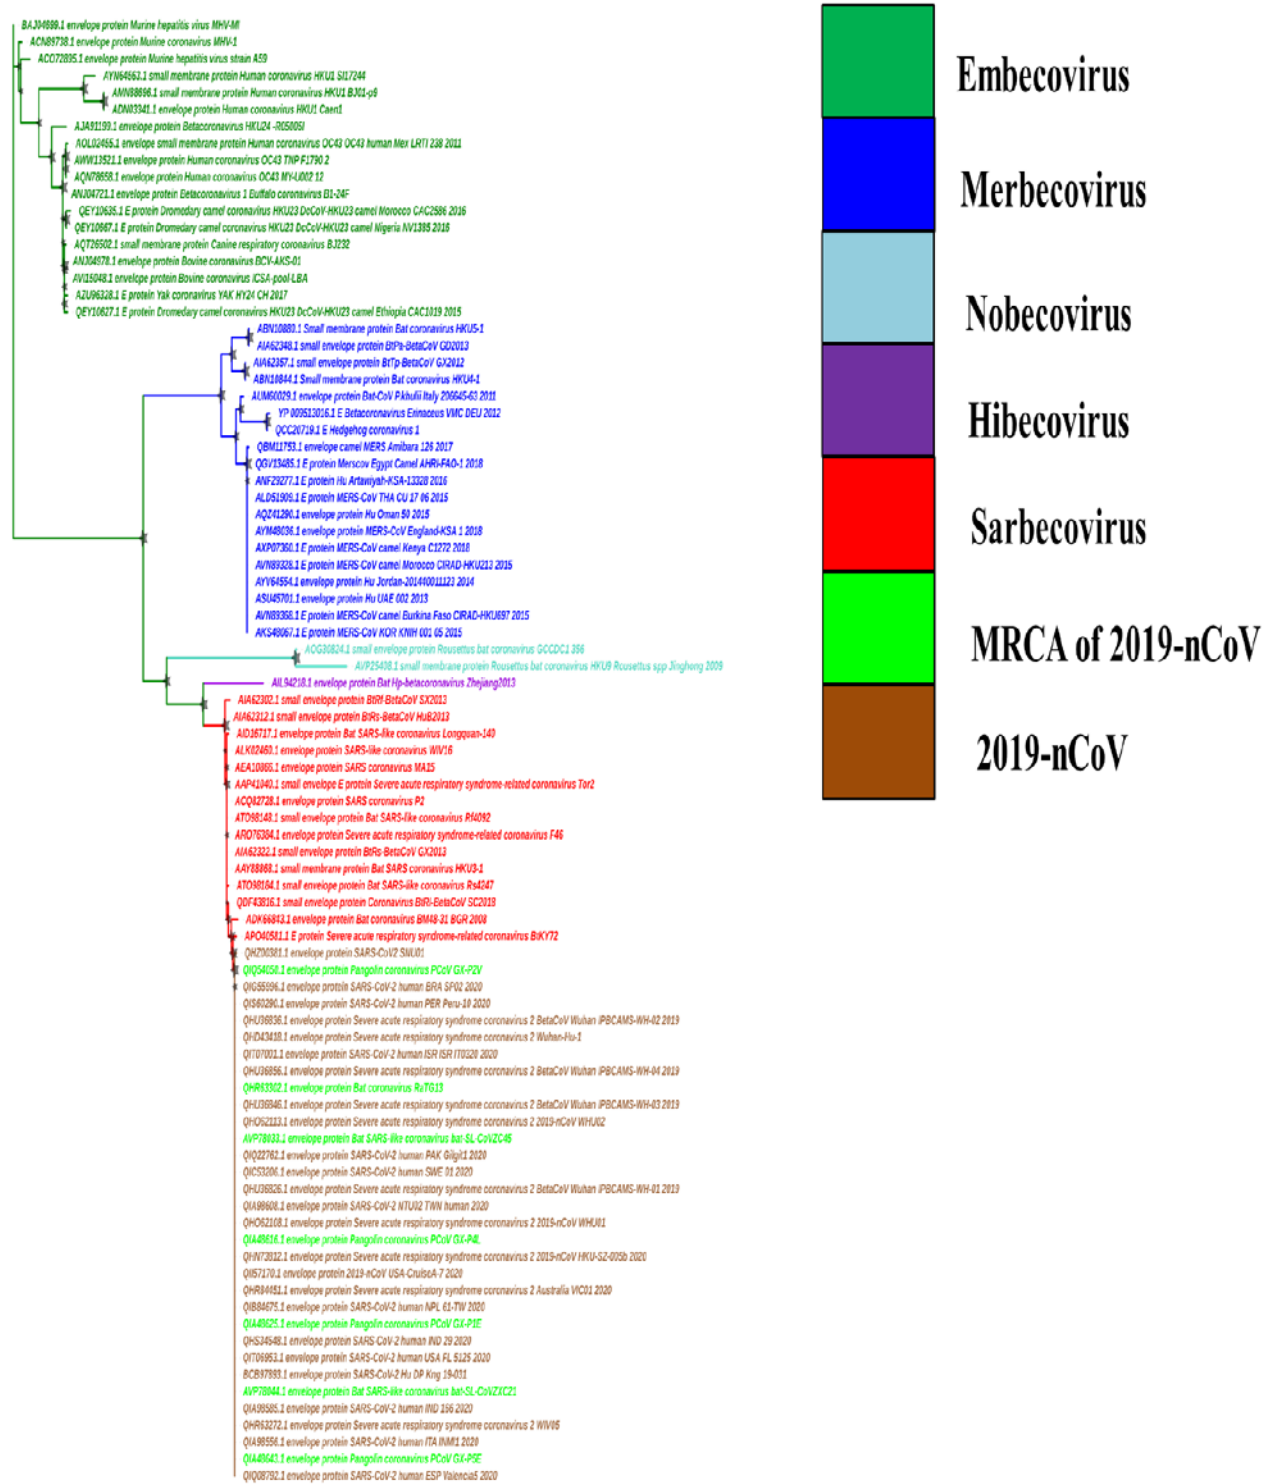

**Figure 7: Envelope (E) gene phylogeny.** Alignment consists of 90 aligned amino acid characters (74 are completely aligned characters). Tree was reconstructed using ML method and JTT+I+G4 model of protein evolution along with 1000 bootstrap replicates (asterisk indicates value >70%). MRCA (most recent common ancestors) are the closely related ancestor group from nCoV19.

We conducted both genome (*Betacoronavirus*) and gene recombination analysis using RDP5 package (Martin et al., 2015). The genome recombination analysis detected 21 putative recombination signals (Table 1). Recombination results show that major recombination events took place between Clade 2 and Clade 3 of Sarbecovirus (Table 1). Gene recombination analysis found there are widespread recombination events in orf1ab and S proteins (Table 2). M and N proteins reported few recombination events and envelope (E) protein did not show any recombination event. Major genetic variations in these genes, particularly in spike (S) gene, seemed essential for the transition from animal-to-human transmission to human-to-human transmission, which eventually caused the outbreak of 2019-nCoV (Su et al., 2016; Luk et al. 2019; Jaimes et al., 2020). Details of the genome and gene recombination analyses are given in Table 1 and Table 2 respectively.

It was found that the most closely related bat and SARS-CoVs diverged in 1986, an estimated divergence time of 17 years prior to the outbreak in December 2002 (Vijaykrishna et al., 2007). In a similar line, a recent article by Lu et al. (2020) reported that intermediate transmission happened long back of 2019-nCoV outbreak in December 2019. Incidentally 2019-nCoV (SARS-CoV-2) outbreak also happened in the same time interval of 17 years in 2019 and also in the same winter season. Further, evolutionary studies have shown that 2019-nCoV is genetically distance from SARS-CoVs with 88~96% sequence similarity between them (Ceraolo and Giorgi, 2020; Lu et al., 2020). So the open question is which factors made 2019-nCoV is highly pathogenic: mutation, recombination, structural changes of spike protein, combination of multiple factors, or something else which needs to be explored. Thus, further studies on detailed analysis of 2019-nCoV genomes, particularly the spike protein sequences and structures, as well as the receptors for the individual novel coronaviruses will enable to understand the origin, pathogenicity and mechanism behind interspecies jumping at the molecular level, which will help in the prevention of future zoonotic events.

**Table1:** Detected recombination events in the Betacoronavirus genomes. Twenty one potential recombination signals were detected by using RDP5 package. A recombination event was reported, when five out of seven methods detected it. Details of genome recombination analysis are given in the text.

| Events no. | Recombinant sequences                            | Major parent                                    | Minor parent                             |
|------------|--------------------------------------------------|-------------------------------------------------|------------------------------------------|
| 1          | MG772933 bat_SL_CoVZC45 Bat China                | MN996532 Organism:Bat coronavirus RaTG13        | KF294457 Longquan_140 Bat China          |
| 2          | KY417145 Rf4092 Bat China                        | KT444582 WIV16 Bat China                        | KU973692 F46 Bat China                   |
| 3          | KF294457 Longquan_140 Bat China                  | DQ022305 HKU3_1 Bat China                       | MG772934 bat_SL_CoVZXC21 Bat China       |
| 4          | KJ473815 BtRs_GX2013 Bat China                   | KF294457 Longquan_140 Bat China                 | KT444582 WIV16 Bat China                 |
| 5          | MK211374 BtR1_BetaCoV/SC2018 Bat China           | KF294457 Longquan_140 Bat China                 | AY304486 SZ3 Civet Hong_Kong             |
| 6          | KY417148 Rs4247 Bat China                        | DQ022305 HKU3_1 Bat China                       | KY417145 Rf4092 Bat China                |
| 7          | KJ473815 BtRs_GX2013 Bat China                   | DQ022305 HKU3_1 Bat China                       | AY304486 SZ3 Civet Hong_Kong             |
| 8          | KU973692 F46 Bat China                           | FJ882963 P2 Human USA                           | KJ473814 BtRs_HuB2013 Bat China          |
| 9          | MK211374 BtR1_BetaCoV/SC2018 Bat China           | KJ473814 BtRs_HuB2013 Bat China                 | KY417145 Rf4092 Bat China                |
| 10         | MK211374 BtR1_BetaCoV/SC2018 Bat China           | KJ473814 BtRs_HuB2013 Bat China                 | FJ882963 P2 Human USA                    |
| 11         | MT039890 SNU01 Human South_Korea                 | MG772934 bat_SL_CoVZXC21 Bat China              | JF292912 MA15 Mouse USA                  |
| 12         | MN514962 DcCoV_HKU23/camel/Ethiopia/CAC1019/2015 | MN514963 DcCoV_HKU23/camel/Morocco/CAC2586/2016 | KX432213 BJ232 Dog China                 |
| 13         | KJ473815 BtRs_GX2013 Bat China                   | KY417145 Rf4092 Bat China                       | DQ022305 HKU3_1 Bat China                |
| 14         | FJ647223 MHV_1 Mouse USA                         | FJ884687 A59 Mouse USA                          | AB551247 MHV_MI Mouse Australia          |
| 15         | KJ473813 BtRf_SX2013 Bat China                   | KJ473814 BtRs_HuB2013 Bat China                 | JF292912 MA15 Mouse USA                  |
| 16         | MK211374 BtR1_BetaCoV/SC2018 Bat China           | KY352407 BtKY72 Bat Kenya                       | MN996532 Organism:Bat coronavirus RaTG13 |
| 17         | MN996532 Organism:Bat coronavirus RaTG13         | MT040334 PCoV_GX_P1E Pangolin China             | KY417145 Rf4092 Bat China                |
| 18         | KF294457 Longquan_140 Bat China                  | KJ473814 BtRs_HuB2013 Bat China                 | MG772934 bat_SL_CoVZXC21 Bat China       |
| 19         | AY304486 SZ3 Civet Hong_Kong                     | KY417148 Rs4247 Bat China                       | KU973692 F46 Bat China                   |
| 20         | KY417148 Rs4247 Bat China                        | AY304486 SZ3 Civet Hong_Kong                    | KJ473815 BtRs_GX2013 Bat China           |
| 21         | KJ473815 BtRs_GX2013 Bat China                   | AY613950 PC4_227 Civet China                    | MN996532 Organism:Bat coronavirus RaTG13 |



**Table2:** Detected recombination events in the four Betacoronavirus genes. A recombination event was reported, when five out of seven methods detected by RDP5 package. Details of gene recombination analysis are given in the text.

| Gene name                    | Recombinant sequence(s)                             | Major parent sequence                         | Minor parent sequence                                          |
|------------------------------|-----------------------------------------------------|-----------------------------------------------|----------------------------------------------------------------|
| <b>Orflab gene</b>           | AID16715.1_[Bat_SL-Cov_Longquan140]                 | AIA62309.1_[BtRs-BetaCoV_HuB2013]             | AVP78041.1_[Bat_SL-CoVZXC21]                                   |
|                              | AVP78030.1_[Bat_SL-CoVZC45]                         | QHR63299.1_[Bat_coronavirus_RaTG13]           | AIA62319.1_[BtRs-BetaCoV_GX2013]                               |
|                              | AVP78041.1_[Bat_SL-CoVZXC21]                        |                                               |                                                                |
|                              | AID16715.1_[Bat_SL-Cov_Longquan140]                 | AVP78041.1_[Bat_SL-CoVZXC21]                  | AAV88865.2_[Bat_SARS_CoV_HKU3-1]                               |
|                              | QDF43814.1_[Coronavirus_BtRI-BetaCoV_SC2018]        | AIA62309.1_[BtRs-BetaCoV_HuB2013]             | ALK02468.1_[SARS-like_CoV_WIV16]                               |
| <b>Spike (S) gene</b>        | ARO76382.1_[SARS_CoV_F46]                           | Unknown<br>(AIA62300.1_[BtRf-BetaCoV_SX2013]) | ATO98181.1_[Bat_SL_CoV_Rs4247]                                 |
|                              | QDF43815.1_[BtRI-Beta_CoV_SC2018]                   |                                               |                                                                |
|                              | AVP78042.1_[Bat_SL_CoV_ZXC21]                       | QHR63300.2_[Bat_coronavirus_RaTG13]           | AIA62300.1_[BtRf-BetaCoV_SX2013]                               |
|                              | AAV88866.1_[Bat_SARS_CoV_HKU3-1]                    | ATO98181.1_[Bat_SL_CoV_Rs4247]                | Unknown<br>(AAP41037.1_[SARS_CoV_Tor2])                        |
|                              | AIA62300.1_[BtRf-BetaCoV_SX2013]                    | AID16716.1_Bat_SL_CoV_Longquan140]            | Unknown<br>(AAP41037.1_[SARS_CoV_Tor2])                        |
|                              | ALK02457.1_[Bat_SL_CoV_WIV16]                       | AIA62320.1_[BtRs-BetaCoV_GX2013]              | AQZ41285.1_[Hu_Oman_50_2015]                                   |
|                              | AUM60024.1_[Bat-CoV_P.khulii_Italy_20664-5-63_2011] | AIA62343.1_[BtPa-BetaCoV_GD2013]              | AQZ41285.1_[Hu_Oman_50_2015]                                   |
|                              | QIA98583.1_[SARS-CoV-2_human_IND_166]               | AIA62300.1_[BtRf-BetaCoV_SX2013]              | Unknown<br>(AIL94216.1_[Bat_Hp-betacoronavirus_Zhejiang_2013]) |
|                              | AAP41037.1_[SARS_CoV_Tor2]                          | QHR63300.2_[Bat_coronavirus_RaTG13]           | AIA62320.1_[BtRs-BetaCoV_GX2013]                               |
|                              | AWW13519.1_[Human_coronavirus_OC43]                 | AVI15044.1_[Bovine_coronavirus_ICSA-pool-LBA] | QEY10625.1_[DcCoV-HKU23]                                       |
| <b>Nucleocapsid (N) gene</b> | ACN89735.1_[Murine_coronavirus_MHV-1]               | AJA91202.1_[Betacoronavirus_HKU24_R05005]     | Unknown<br>(AVP25410.1_[Rousettus_Bat_CoV_HKU9_Jinghong_2009]) |
| <b>Membrane (M) gene</b>     | AVP25409.1_[Rousettus_Bat_CoV_HKU9_Jinghong_2009]   | AVI15049.1_[Bovine_coronavirus_ICSA-pool-LBA] | ADK66844.1_[Bat_coronavirus_BM48-31_BGR_2008]                  |

## Concluding remarks

In this work we performed a large-scale genome and gene phylogenetic analyses of the 162 full *Orthocoronavirinae* genomes and their five protein sequences. Our analysis revealed that: i) bat, pangolin and anteater are the natural reservoir host of *Betacoronavirus*, ii) transmission of *Beta coronavirus* to human took place by inter-intra species model (i.e. from bat/pangolin/anteater to intermediate organism and then from intermediate organism to human), iii) host-specific adaptive mutation occurred among the coronavirus strains including 2019-nCoV, iv) gene tree and gene recombination analysis confirmed the widespread presence of recombination events, and v) genome recombination analysis found that recombination events between intra-subgenera are more frequent than inter-subgenera, which possibly led to the evolution of new strains such as 2019-nCoV/SARS-CoV-2.

## Acknowledgements

This work was partly supported by the Department of Biotechnology (DBT) and University Grants Commission (UGC), India. Thanks to Dr. Rachana Banerjee for several useful discussions. We thank Mr. Arindam Ghosh for editorial supports.

## References

- Andersen, K.G., et al., 2020. The proximal origin of SARS-CoV-2. *Nat Med* 26, 450–452. <https://doi.org/10.1038/s41591-020-0820-9>
- Ceraolo, C., Giorgi, F.M., 2020. Genomic variance of the 2019-nCoV coronavirus. *J Med Virol* 92, 522–528. <https://doi.org/10.1002/jmv.25700>
- Cui, J., Li, F., Shi, Z.-L., 2019. Origin and evolution of pathogenic coronaviruses. *Nat Rev Microbiol* 17, 181–192. <https://doi.org/10.1038/s41579-018-0118-9>
- De Groot, R.J., Baker, S.C., Baric, R., Enjuanes, L., Gorbalenya, A.E. and Holmes, K.V., 2011. King AMQ, Lefkowitz E, Adams MJ, Carstens EB Family Coronaviridae. Ninth Report of the International Committee on Taxonomy of Viruses, 806-828.
- Degnan, J.H., Rosenberg, N.A., 2009. Gene tree discordance, phylogenetic inference and the multispecies coalescent. *Trends in Ecology & Evolution* 24, 332–340. <https://doi.org/10.1016/j.tree.2009.01.009>

Eickmann, M., 2003. Phylogeny of the SARS Coronavirus. *Science* 302, 1504b–11505. <https://doi.org/10.1126/science.302.5650.1504b>

Fan, Y., Zhao, K., Shi, Z.-L., Zhou, P., 2019. Bat Coronaviruses in China. *Viruses* 11, 210. <https://doi.org/10.3390/v11030210>

Gorbalenya, A.E., Baker, S.C., Baric, R.S., de Groot, R.J., Drosten, C., Gulyaeva, A.A., Haagmans, B.L., Lauber, C., Leontovich, A.M., Neuman, B.W. and Penzar, D., 2020. The species Severe acute respiratory syndrome-related coronavirus: classifying 2019-nCoV and naming it SARS-CoV-2. *Nature Microbiology*.5, 536-544. <https://doi.org/10.1038/s41564-020-0695-z>

Jaimes, J.A., André, N.M., Chappie, J.S., Millet, J.K., Whittaker, G.R., 2020. Phylogenetic Analysis and Structural Modeling of SARS-CoV-2 Spike Protein Reveals an Evolutionary Distinct and Proteolytically Sensitive Activation Loop. *Journal of Molecular Biology* S0022283620302874. <https://doi.org/10.1016/j.jmb.2020.04.009>

Jeffroy, O., Brinkmann, H., Delsuc, F., et al., 2006. Phylogenomics: the beginning of incongruence? *Trends in Genetics* 22, 225–231. <https://doi.org/10.1016/j.tig.2006.02.003>

Katoh, K., 2002. MAFFT: a novel method for rapid multiple sequence alignment based on fast Fourier transform. *Nucleic Acids Research* 30, 3059–3066. <https://doi.org/10.1093/nar/gkf436>

Lai, C.C., Shih, T.P., Ko, W.C., Tang, H.J. and Hsueh, P.R., 2020. Severe acute respiratory syndrome coronavirus 2 (SARS-CoV-2) and corona virus disease-2019 (COVID-19): the epidemic and the challenges. *International journal of antimicrobial agents* 55, 105924. <https://doi.org/10.1016/j.ijantimicag.2020.105924>

Letunic, I., Bork, P., 2016. Interactive tree of life (iTOL) v3: an online tool for the display and annotation of phylogenetic and other trees. *Nucleic Acids Res* (44), 242–245. <https://doi.org/10.1093/nar/gkw290>

Li, C., Yang, Y. and Ren, L., 2020. Genetic evolution analysis of 2019 novel coronavirus and coronavirus from other species. *Infection, Genetics and Evolution*, 82, 104285. <https://doi.org/10.1016/j.meegid.2020.104285>

Lu, R., et al., 2020. Genomic characterisation and epidemiology of 2019 novel coronavirus: implications for virus origins and receptor binding. *The Lancet*, 395, 565-574.

Luk, H.K.H., Li, X., Fung, J., Lau, S.K.P., Woo, P.C.Y., 2019. Molecular epidemiology, evolution and phylogeny of SARS coronavirus. *Infection, Genetics and Evolution* 71, 21–30. <https://doi.org/10.1016/j.meegid.2019.03.001>

Martin, D.P., Murrell, B., Golden, M., Khoosal, A., Muhire, B., 2015. RDP4: Detection and analysis of recombination patterns in virus genomes. *Virus Evolution* 1. <https://doi.org/10.1093/ve/vev003>

Nguyen, L.-T., et al., 2015. IQ-TREE: A Fast and Effective Stochastic Algorithm for Estimating Maximum-Likelihood Phylogenies. *Molecular Biology and Evolution* 32, 268–274. <https://doi.org/10.1093/molbev/msu300>

Som, A., 2013. Genome-scale approach and the accuracy of phylogenetic methods. *J Phylogen Evolution Biol* 1: 116. <https://doi:10.4172/2329-9002.1000116>

Som, A., 2015. Causes, consequences and solutions of phylogenetic incongruence. *Briefings in Bioinformatics* 16, 536–548. <https://doi.org/10.1093/bib/bbu015>

Song, H.-D et al., 2005. Cross-host evolution of severe acute respiratory syndrome coronavirus in palm civet and human. *Proceedings of the National Academy of Sciences* 102, 2430–2435. <https://doi.org/10.1073/pnas.0409608102>

Su, S., Wong, G., Shi, W., et al., 2016. Epidemiology, Genetic Recombination, and Pathogenesis of Coronaviruses. *Trends in Microbiology* 24, 490–502. <https://doi.org/10.1016/j.tim.2016.03.003>

Velavan, T.P., Meyer, C.G., 2020. The COVID-19 epidemic. *Trop Med Int Health* 25, 278–280. <https://doi.org/10.1111/tmi.13383>

Vijaykrishna, D., et al., 2007. Evolutionary Insights into the Ecology of Coronaviruses. *JVI* 81, 4012–4020. <https://doi.org/10.1128/JVI.02605-06>

Woo, P.C.Y., et al., 2009. Coronavirus Diversity, Phylogeny and Interspecies Jumping. *Exp Biol Med (Maywood)* 234, 1117–1127. <https://doi.org/10.3181/0903-MR-94>

Woo, P.C.Y., et al., 2010. Coronavirus Genomics and Bioinformatics Analysis. *Viruses* 2, 1804–1820. <https://doi.org/10.3390/v2081803>

Wu, F., Zhao, S., Yu, B., Chen, Y.-M., Wang, W., Song, Z.-G., Hu, Y., Tao, Z.-W., Tian, J.-H., Pei, Y.-Y., Yuan, M.-L., Zhang, Y.-L., Dai, F.-H., Liu, Y., Wang, Q.-M., Zheng, J.-J., Xu, L., Holmes, E.C., Zhang, Y.-Z., 2020. A new coronavirus associated with human respiratory disease in China. *Nature* 579, 265–269. <https://doi.org/10.1038/s41586-020-2008-3>

WHO (World Health Organization), COVID-19 situation reports. <https://www.who.int/emergencies/diseases/novel-coronavirus-2019/situation-reports>

Xu, L., et al., 2016. Detection and characterization of diverse alpha- and betacoronaviruses from bats in China. *Virol. Sin.* 31, 69–77. <https://doi.org/10.1007/s12250-016-3727-3>

York, A., 2020. Novel coronavirus takes flight from bats? *Nat Rev Microbiol* 18, 191–191. <https://doi.org/10.1038/s41579-020-0336-9>

Zhou, P., et al., 2020. A pneumonia outbreak associated with a new coronavirus of probable bat origin. *Nature* 579, 270–273. <https://doi.org/10.1038/s41586-020-2012-7>

Zhu, N., Zhang, D., Wang, W., et al., 2020. A Novel Coronavirus from Patients with Pneumonia in China, 2019. *N Engl J Med* 382, 727–733. <https://doi.org/10.1056/NEJMoa2001017>

Zumla, A., Hui, D.S. and Perlman, S., 2015. Middle East respiratory syndrome. *The Lancet*, 386(9997), pp.995-1007. [https://doi: 10.1016/S0140-6736\(15\)60454-8](https://doi:10.1016/S0140-6736(15)60454-8)

## **Supplementary data**

**Supplementary File 1:** Details of the 162 *Orthocoronavirinae* genomes and four outgroup sequences used in this study.
